# Supplementary material for: Indirect sexual selection drives rapid sperm protein evolution in abalone
Source: eLife. 2019 Dec 23;8:e52628. doi: 10.7554/eLife.52628 (PMC6952181; doi:10.7554/eLife.52628)
Supplement: Figure 2—figure supplement 1—source data 1. [file elife-52628-fig2-figsupp1-data1.csv]

residue	CA Index wo Lysin	CA Index w Lysin	CB Index wo Lysin	CB Index w Lysin
2	NA	NA	0.598	0.584
4	-0.014	0.001	0.518	0.48
5	-0.198	-0.191	-0.2005	-0.2095
13	0.142	-12.79	0.44	13.344
16	-0.397	-0.393	0.213	0.184
17	-0.185	-0.1	NA	NA
18	0.139	0.107	0.162	0.17
19	0.155	0.2095	-0.028	-0.049
20	-0.3075	-0.206	0.2625	0.227
21	0.0625	-0.295	0.504	0.51
22	-0.198	-0.197	0.5595	0.544
23	0.506	0.714	0.201	0.173
24	0.1115	0.627	0.5505	0.491
25	-0.1845	-0.02	0.3995	0.387
26	0.12	NA	0.478	NA
27	0.061	0.362	0.1045	0.116
28	0.171	0.216	0.467	0.455
29	0.223	0.283	NA	NA
31	0.26	0.211	0.767	0.791
32	-0.097	-0.048	0.404	0.381
34	0.086	0.298	0.19	0.111
35	-0.583	-0.748	0.34475	0.29075
36	1.208	1.218	NA	NA
