# Supplementary material for: Indirect sexual selection drives rapid sperm protein evolution in abalone
Source: eLife. 2019 Dec 23;8:e52628. doi: 10.7554/eLife.52628 (PMC6952181; doi:10.7554/eLife.52628)
Supplement: Figure 2—source data 1. [file elife-52628-fig2-data1.csv]

Lysin residue	VERL intensity perturbation	FITZAP chemical shift perturbation
1	NA	NA
2	NA	NA
3	NA	NA
4	NA	NA
5	NA	NA
6	0.488	0.012
7	0.156	0.005
8	NA	NA
9	0.061	0.005
10	NA	NA
11	NA	NA
12	NA	NA
13	NA	NA
14	0.162	0.003
15	0.199	0.003
16	NA	NA
17	0.267	0.001
18	0.236	0.008
19	0.223	0.002
20	0.217	0.005
21	0.41	0.008
22	0.213	0.01
23	0.267	0.006
24	0.371	0.012
25	NA	NA
26	0.24	0.008
27	0.242	0.019
28	0.252	0.01
29	0.351	0.009
30	0.565	0.006
31	0.734	0.003
32	NA	NA
33	0.291	NA
34	0.476	0.01
35	0.354	0.003
36	0.086	0.007
37	0.153	0.002
38	0.127	0.006
39	0.233	0.006
40	NA	NA
41	NA	NA
42	0.161	0.003
43	0.279	0.009
44	NA	NA
45	0.239	0.017
46	0.277	0.005
47	0.225	0.003
48	NA	NA
49	0.289	0.007
50	NA	NA
51	0.212	0.01
52	0.411	0.006
53	0.447	0.025
54	0.377	NA
55	0.351	0.032
56	0.768	0.011
57	0.686	0.121
58	0.575	0.009
59	0.423	0.03
60	1.445	0.084
61	NA	NA
62	0.574	0.011
63	1.035	0.006
64	0.867	0.008
65	0.702	0.044
66	0.392	0.02
67	NA	NA
68	0.432	0.006
69	0.463	0.014
70	0.277	0.003
71	0.325	0.009
72	0.413	0.018
73	NA	NA
74	0.332	0.011
75	0.348	0.01
76	0.235	0.006
77	-0.005	0.004
78	0.147	NA
79	-0.025	NA
80	NA	NA
81	0.19	0.008
82	0.18	0.005
83	NA	0.011
84	0.462	0.013
85	NA	NA
86	0.24	0.011
87	0.267	0.008
88	NA	NA
89	0.223	0.008
90	0.217	0.016
91	0.344	0.024
92	NA	NA
93	0.5	0.032
94	0.4	0.041
95	NA	0.082
96	NA	NA
97	NA	NA
98	NA	NA
99	0.593	0.039
100	1.691	0.02
101	0.499	NA
102	NA	NA
103	0.606	0.012
104	0.5	NA
105	0.566	0.067
106	0.334	NA
107	0.751	0.005
108	0.621	0.029
109	NA	NA
110	0.615	0.002
111	0.415	0.029
112	NA	NA
113	0.467	0.01
114	0.289	0.017
115	0.518	0.015
116	NA	NA
117	NA	NA
118	0.267	0.014
119	0.435	0.012
120	0.669	0.01
121	NA	NA
122	0.245	0.006
123	NA	NA
124	0.356	0.007
125	0.212	0.004
126	NA	NA
127	0.167	0.008
128	0.26	0.004
129	0.257	0.001
130	NA	NA
131	0.281	0.002
132	0.494	NA
133	0.749	0.004
134	0.307	0.005
