# Supplementary material for: Indirect sexual selection drives rapid sperm protein evolution in abalone
Source: eLife. 2019 Dec 23;8:e52628. doi: 10.7554/eLife.52628 (PMC6952181; doi:10.7554/eLife.52628)
Supplement: Figure 3—source data 2. [file elife-52628-fig3-data2.csv]

residue	150 mM	200 mM	250 mM	300 mM	350 mM	400 mM	450 mM	500 mM
6	0.831102999	0.829258107	0.883100344	0.876920235	0.945222296	0.9328941	0.990532	0.965383099
8	0.836577762	0.862180675	0.86874009	0.931296497	0.987456395	1.016865798	1.038257992	1.022166655
10	0.83374035	0.936160767	0.941591722	0.919649802	0.922307663	0.963251916	0.965493934	0.936768789
11	0.739286608	0.879734479	0.899259011	0.935902529	0.916335019	0.938341291	0.963793	0.947630305
13	0.483109011	0.585187701	0.636570273	0.714999139	0.790014332	0.814786422	0.870700481	0.87023066
14	0.080462812	0.084941012	NA	NA	0.465598276	0.555586836	0.610270478	0.636898345
17	0.174122297	0.281121254	0.360316598	0.417178659	0.493491682	0.571428338	0.658303744	0.677412254
18	0.201242083	0.371415963	0.444744163	0.560977839	0.529570548	0.695443372	0.768915459	0.640602148
19	NA	NA	NA	0.244721291	0.305523812	0.35572343	0.392354986	0.419575216
20	NA	0.221332249	0.297683124	0.341612803	0.396798298	0.426094169	0.510414604	0.544549989
21	0.066021309	0.110233905	0.199246307	0.300085499	0.455236624	0.53440698	0.620733137	0.630853705
22	NA	0.111695412	0.151539787	0.197726013	0.274875017	0.309999654	0.345163147	0.410709511
23	0.193070709	0.303281732	0.405535551	0.560829775	0.578183405	0.595125881	0.63618833	0.70660923
24	0.099406959	0.145394315	0.20317695	0.256159775	0.31866719	0.360458028	0.409136505	0.432505467
25	0.025419564	0.046538838	0.074140965	0.11124845	0.149132009	0.173825538	0.206713351	0.244561196
26	0.055525189	0.082613215	0.096297349	0.146584603	0.193409014	0.21627401	0.252245973	0.287162333
27	0.085594589	0.127135321	0.172282723	0.202684015	0.269736955	0.322401504	0.358685951	0.395649872
30	0.397570606	0.501488423	0.577308143	0.739489369	0.627310212	0.899307297	0.875780357	0.963787184
31	0.440263949	0.557029191	0.662511804	0.707855207	0.813564011	0.876631151	0.907843014	0.898205143
32	0.164915924	0.243816065	0.297891318	0.353285978	0.375706639	0.427680104	0.448599446	0.452988076
33	0.201117941	0.272256984	0.320171324	0.375364354	0.440593228	0.50327848	0.548947502	0.569284163
35	0.120607386	0.187924971	0.238479281	0.288021254	0.319055136	0.39609526	0.410295483	0.408308588
36	0.167771789	0.248252897	0.292035116	0.367167776	0.448031945	0.492850276	0.478404027	0.476969757
